# Supplementary material for: Mortality associated with heart failure with preserved vs. reduced ejection fraction in a prospective international multi-ethnic cohort study
Source: Oxford University Press journal article supplement (doi:10.1093/eurheartj/ehy005), 2018-01-11
Supplement: eurheartj_39_20_1770_s1.docx [file eurheartj_39_20_1770_s1.docx]

**SUPPLEMENTARY FIGURE 1**

**Echocardiographic data used to assess LV systolic function for NZ and Singapore patients**

**Quantitative Echo LVEF**

**N=1845 (90.5) [NZ 779 (83%); Singapore 1066 (97%)]**

**Semi-qualitative LVEF**

**N=148 (7.3%) [NZ 147 (16%); Singapore 1 (0.1%)]**

**LVEF using mmode or 2D linear dimensions**

**N=17 (0.8%) [NZ 14 (1.5%); Singapore 3 (0.3%)]**

*If not available, semi-qualitative LV assessment was used*

*If not available, linear dimensions (mmode or 2D) were used to calculate LVEF*

**Prior LVEF: quantitative LVEF**

**N=29 (1.4%) [NZ 1 (0.1%); Singapore 28 (2.8%)**

*If not available, prior quantitative LVEF from baseline CRF was used*

**Baseline LV Function data for PEOPLE/SHOP Studies**

**N=2039 (100%) [NZ 941; Singapore 1098]**
