# Supplementary material for: Mortality associated with heart failure with preserved vs. reduced ejection fraction in a prospective international multi-ethnic cohort study
Source: Oxford University Press journal article supplement (doi:10.1093/eurheartj/ehy005), 2018-01-11
Supplement: eurheartj_39_20_1770_s3.docx [file eurheartj_39_20_1770_s3.docx]

**Supplementary Table 2.** Multiple linear regression for predictors of baseline NTproBNP.

|  | **Parameter Estimate** | **95% CI** | | **VIF** | **Pr > |t|** |
| --- | --- | --- | --- | --- | --- |
|  |  | **HFpEF** |  |  |  |
| *Intercept* | -2.354 | -4.702 | -0.006 | 0.000 | 0.050 |
| Age | 0.020 | 0.008 | 0.031 | 1.563 | 0.001 |
| Sex (Female) | 0.404 | 0.165 | 0.642 | 1.307 | 0.001 |
| Ischaemic Aetiology | -0.043 | -0.268 | 0.181 | 1.136 | 0.704 |
| Hypertension | -0.192 | -0.463 | 0.079 | 1.162 | 0.165 |
| Diabetes | 0.029 | -0.205 | 0.262 | 1.248 | 0.808 |
| AF | 0.583 | 0.324 | 0.843 | 1.548 | <.0001 |
| BMI | -0.028 | -0.048 | -0.009 | 1.514 | 0.004 |
| Heart Rate | 0.005 | -0.003 | 0.014 | 1.146 | 0.200 |
| Systolic BP | 0.010 | 0.005 | 0.015 | 1.102 | 0.000 |
| NYHA Class (III/IV) | -0.142 | -0.403 | 0.120 | 1.105 | 0.288 |
| log(Creatinine) | 1.115 | 0.818 | 1.411 | 1.282 | <.0001 |
| LVEDD Index | 0.021 | -0.011 | 0.053 | 2.000 | 0.189 |
| LA Volume Index | 0.014 | 0.008 | 0.020 | 1.531 | <.0001 |
| RWT | 1.440 | 0.398 | 2.483 | 1.587 | 0.007 |
|  |  | **HFmrEF** |  |  |  |
| *Intercept* | 1.764 | -1.332 | 4.860 | 0.000 | 0.262 |
| Age | 0.004 | -0.010 | 0.018 | 1.356 | 0.562 |
| Sex (Female) | 0.262 | -0.082 | 0.606 | 1.141 | 0.135 |
| Ischaemic Aetiology | 0.616 | 0.279 | 0.953 | 1.280 | 0.000 |
| Hypertension | -0.157 | -0.572 | 0.258 | 1.454 | 0.456 |
| Diabetes | 0.171 | -0.165 | 0.506 | 1.259 | 0.317 |
| AF | 0.364 | -0.005 | 0.733 | 1.541 | 0.053 |
| BMI | -0.041 | -0.068 | -0.015 | 1.488 | 0.002 |
| Heart Rate | 0.014 | 0.003 | 0.026 | 1.103 | 0.017 |
| Systolic BP | -0.001 | -0.008 | 0.006 | 1.394 | 0.684 |
| NYHA Class (III/IV) | -0.135 | -0.563 | 0.292 | 1.246 | 0.533 |
| log(Creatinine) | 0.639 | 0.261 | 1.017 | 1.211 | 0.001 |
| LVEDD Index | 0.026 | -0.024 | 0.077 | 2.078 | 0.309 |
| LA Volume Index | 0.021 | 0.012 | 0.030 | 1.347 | <.0001 |
| RWT | 1.473 | -0.332 | 3.278 | 1.557 | 0.109 |
|  |  | **HFrEF** |  |  |  |
| *Intercept* | 1.716 | 0.276 | 3.157 | 0.000 | 0.020 |
| Age | 0.007 | 0.001 | 0.013 | 1.592 | 0.022 |
| Sex (Female) | 0.072 | -0.011 | 0.222 | 1.098 | 0.437 |
| Ischaemic Aetiology | 0.213 | 0.063 | 0.363 | 1.340 | 0.005 |
| Hypertension | -0.078 | -0.219 | 0.064 | 1.153 | 0.281 |
| Diabetes | 0.119 | -0.021 | 0.259 | 1.202 | 0.095 |
| AF | 0.224 | 0.062 | 0.386 | 1.399 | 0.007 |
| BMI | -0.044 | -0.057 | -0.032 | 1.596 | <.0001 |
| Heart Rate | 0.011 | 0.006 | 0.016 | 1.099 | <.0001 |
| Systolic BP | 0.000 | -0.003 | 0.004 | 1.119 | 0.788 |
| NYHA Class (III/IV) | -0.205 | -0.357 | -0.052 | 1.073 | 0.009 |
| log(Creatinine) | 0.921 | 0.730 | 1.113 | 1.200 | <.0001 |
| LVEDD Index | 0.029 | 0.012 | 0.046 | 2.157 | 0.001 |
| LA Volume Index | 0.010 | 0.006 | 0.013 | 1.294 | <.0001 |
| RWT | 0.379 | -0.397 | 1.155 | 1.581 | 0.338 |

Beta coefficients are provided for each variable in models built in the 3 EF groups along with the variance inflation factor (VIF). The variance inflation factors are uniformly low suggesting muticollinearity is not limiting these models. Overall R-squared for HFpEF group was 0.42, HFmrEF group was 0.38, and for HFrEF group was 0.32
