# Supplementary material for: Mortality associated with heart failure with preserved vs. reduced ejection fraction in a prospective international multi-ethnic cohort study
Source: Oxford University Press journal article supplement (doi:10.1093/eurheartj/ehy005), 2018-01-11
Supplement: eurheartj_39_20_1770_s4.docx [file eurheartj_39_20_1770_s4.docx]

**Supplementary Table 3.** Multivariable analyses for a) death and b) death or HF readmission overall and by country**.**

1. **Death from any cause: Model C (including NT-proBNP)**

|  | **Overall** | **New Zealand** | **Singapore** |
| --- | --- | --- | --- |
| **Variable** | **HR (95% CI)** | **HR (95% CI)** | **HR (95% CI)** |
| HRrEF < 40% | 1 | 1 | 1 |
| HRmrEF 40-50% | 0.77 (0.49, 1.2) | 0.69 (0.37, 1.26) | 0.9 (0.47, 1.74) |
| HFpEF > 50% | 1.19 (0.84, 1.68) | 1.11 (0.72, 1.72) | 1.2 (0.66, 2.18) |
| Age (years) | 1.02 (1.01, 1.03)* | 1.01 (1, 1.03) | 1.03 (1.01, 1.05)* |
| Female sex | 0.85 (0.63, 1.15) | 1 (0.67, 1.51) | 0.8 (0.51, 1.26) |
| Hypertension | 1.00 (0.76, 1.31) | 0.86 (0.59, 1.24) | 1.15 (0.76, 1.76) |
| Diabetes | 1.08 (0.84, 1.4) | 1.27 (0.88, 1.84) | 0.97 (0.67, 1.4) |
| Ischaemic aetiology | 1.4 (1.07, 1.83)* | 1.4 (0.97, 2.03) | 1.41 (0.94, 2.13) |
| NYHA Class (III/IV) | 1.75 (1.37, 2.25)* | 1.23 (0.88, 1.73) | 2.46 (1.72, 3.52)* |
| AF | 1.15 (0.88, 1.5) | 1.35 (0.93, 1.95) | 0.97 (0.65, 1.44) |
| SBP (per 10mmHg) | 0.88 (0.83, 0.94)* | 0.90 (0.83, 0.98)* | 0.87 (0.79, 0.95)* |
| Heart rate (per 10bpm) | 0.95 (0.87, 1.03) | 0.90 (0.80, 1.01) | 0.99 (0.87, 1.12) |
| LBBB | 1.09 (0.8, 1.47) | 1.21 (0.84, 1.74) | 0.88 (0.47, 1.64) |
| log creatinine | 1.14 (0.8, 1.63) | 2.27 (1.36, 3.79)* | 0.69 (0.42, 1.14) |
| log NTproBNP | 1.84 (1.61, 2.1)* | 1.98 (1.62, 2.43)* | 1.77 (1.49, 2.11)* |

* p< 0.05

1. **Death from any cause or HF readmission: Model C (including NT-proBNP)**

|  | **Overall** | **New Zealand** | **Singapore** |
| --- | --- | --- | --- |
| **Variable** | **HR (95% CI)** | **HR (95% CI)** | **HR (95% CI)** |
| HRrEF < 40% | 1 | 1 | 1 |
| HRmrEF 40-50% | 1.09 (0.85, 1.40) | 1.07 (0.75, 1.54) | 1.1 (0.78, 1.54) |
| HFpEF > 50% | 1.13 (0.9, 1.40) | 1.13 (0.83, 1.53) | 1.13 (0.81, 1.56) |
| Age (years) | 1.00 (1, 1.01) | 1.00 (0.99, 1.01) | 1.01 (1, 1.02) |
| Female sex | 0.92 (0.77, 1.11) | 0.97 (0.74, 1.29) | 0.89 (0.69, 1.15) |
| Hypertension | 1.13 (0.95, 1.35) | 1.15 (0.89, 1.50) | 1.1 (0.86, 1.4) |
| Diabetes | 1.32 (1.12, 1.55)* | 1.37 (1.07, 1.76)* | 1.32 (1.06, 1.64)* |
| Ischaemic aetiology | 1.30 (1.1, 1.54)* | 1.34 (1.04, 1.73)* | 1.26 (1, 1.59) |
| NYHA Class (III/IV) | 1.59 (1.34, 1.87)* | 1.40 (1.10 , 1.77)* | 1.76 (1.39, 2.22)* |
| AF | 1.12 (0.94, 1.33) | 1.05 (0.82, 1.36) | 1.17 (0.92, 1.48) |
| SBP (per 10mmHg) | 0.95 (0.91, 0.98)* | 0.94 (0.88, 0.99)* | 0.96 (0.91, 1.01) |
| Heart rate (per 10bpm) | 1.00 (0.95, 1.06) | 0.99 (0.92, 1.09) | 0.99 (0.92, 1.07) |
| LBBB | 1.19 (0.97, 1.47) | 1.23 (0.95, 1.59) | 1.13 (0.79, 1.62) |
| log creatinine | 1.31 (1.06, 1.63)* | 1.70 (1.19, 2.42)* | 1.12 (0.85, 1.47) |
| log NTproBNP | 1.41 (1.3, 1.52)* | 1.53 (1.33, 1.75)* | 1.36 (1.24, 1.49)* |

* p< 0.05
